# Supplementary material
Source: PubMed Central journal article supplement (PMC3685146)
Supplement: NIHMS464111-supplement-Supplementary_Table_I.pdf [file NIHMS464111-supplement-Supplementary_Table_I.pdf]

|          |          |                            |                             |                     |                     |                      |
|----------|----------|----------------------------|-----------------------------|---------------------|---------------------|----------------------|
| 43398775 |          | TAGTGAGGGC                 | TGGAGGCTGC                  | GCAGACCTCG          | ACGGGCCCTA          | CATGACGTCA           |
| 43398825 |          | CAAAGGGGCC                 | AGACCAAGTG                  | GGGCAGCACC          | CTGCGACCCT          | GCGATCCTGC           |
| 43398875 |          | CTGGCTCAGC                 | CGCCTTCATA                  | TATCTGCTTC          | CTTAAGTCCA          | CTCTTGCCCA           |
| 43398925 |          | GATAGCTTTC                 | AGTTAAAAC                   | AAAGAATGAA          | AGCACTAGGT          | TGAGAGCCCA           |
| 43398975 | CpG1-6   | <b>CGCGGCTACA</b>          | CCC <b>CGT</b> TCTA         | CTCCCCCACT          | CT <b>CGCC</b> AGGC | AAC <b>CGCG</b> CCC  |
| 43399025 | CpG7-11  | CC <b>CGC</b> CTGCA        | GTGGCAT <b>CGT</b>          | <b>CGGCCA</b> CGC   | CCAGTGGCAG          | GGTTTCCAG <b>C</b>   |
| 43399075 | CpG12-15 | <b>GCGAGC</b> CTGC         | AGGCAGG <b>CGG</b>          | GGAAGG <b>CGGA</b>  | GCCAGG <b>CGG</b>   | CCTAGAGTCA           |
| 43399125 | CpG16-18 | CTTCTCCCC <b>CG</b>        | CCCCTGACTG                  | GG <b>CGGG</b> GAGC | <b>CGGGG</b> CTGG   | TCTCTAAGAG           |
| 43399175 |          | TGGGTACCGA                 | <b>G</b> AACAGCCTG          | ACCGTGGAGA          | <b>AG</b> GGCTGCGG  | GAAGCAGAAC           |
| 43399225 |          | ACCGCCCCCA                 | GCGCCCAGCG                  | TGCTCCAGAA          | ACATGAGCAC          | AAACGCCTCA           |
| 43399275 |          | GCCTCCTTCC                 | CCGGCCGGC                   | CGGCACCGGC          | ACCAGTACCC          | GCACCAGTAC           |
| 43399325 |          | CGGCACCGGC                 | ACCAGTACCC                  | GCACCAGTAC          | CGGCACCGGC          | ACCAGTACCC           |
| 43399375 |          | GCACCAGTAC                 | CGGCACCGGC                  | ACCGAGCGCA          | AGGCGGAGGG          | CCCGCCCGAA           |
| 43399425 | CpG19-21 | GCCGGGGGCA                 | CAACTGCCCA                  | GGTCC <b>CGAAC</b>  | <b>CGGACT</b> CCA   | GCTTGGA <b>CGA</b>   |
| 43399475 | CpG22-26 | CACCTCCTAC                 | AGCCTG <b>TCCG</b>          | AATGGAG <b>CGT</b>  | <b>CGTT</b> CTGAG   | TGG <b>CGGTCCG</b>   |
| 43399525 | CpG27-30 | TCT <b>CGGATCC</b>         | <b>G</b> CTAGCCAGT          | TCCCAGTGGA          | GCA <b>CGT</b> CCTC | AACTGC <b>CGAG</b>   |
| 43399575 | CpG31-32 | GC <b>CGC</b> CTCCT        | GGAGCTCCAG                  | CATACTACTCC         | CCAATCAGCA          | CTAC <b>CGGT</b> TCT |
| 43399625 | CpG33-36 | TAG <b>CGAGAGT</b>         | ACTGACT <b>CGG</b>          | ACTCCAAGAG          | TGGCCT <b>CGG</b>   | GGTTT <b>CAGCG</b>   |
| 43399675 | CpG37-39 | CTTACAACCC                 | <b>GAGCAGT</b> CGG          | ATCCCCAAGT          | CTACCACCAG          | CT <b>CGA</b> ACTCC  |
| 43399725 | CpG40-42 | T <b>CCGAT</b> GGGG        | <b>CGT</b> CACAGC           | CTCCAATCAG          | GACAC <b>CGG</b> CA | TTCCCTGGGT           |
| 43399775 | CpG43-45 | ATTAGTAACA                 | GGACCTACCC                  | <b>CGCCCG</b> TAAA  | CTCCCC <b>CGT</b> A | GAGTCATTGC           |
| 43399825 | CpG46    | AAGGGTCTGC                 | CTTCTCCTCA                  | GGGTT <b>CAGCA</b>  | CCCCA <b>CGGGG</b>  | TTTGGTAAAA           |
| 43399875 | CpG47-49 | GGAC <b>CGACCC</b>         | TGCCCC <b>CGGA</b>          | TTCCAACCTG          | ACCTCAGTGT          | <b>CGGACT</b> TACAC  |
| 43399925 | CpG50-51 | TTGGATATTT                 | GT <b>ACGGGG</b> AC         | CTCCTATAACC         | CAATGACCTT          | <b>T</b> CGAAGTGT    |
| 43399975 | CpG52    | CAATACAAGC                 | ACCTCCTACA                  | CCCAGTAACA          | CCCC <b>CGAGT</b> G | TCAGTACAAG           |
| 43400025 | CpG53    | GGTCTGC <b>CGC</b>         | ATCCTCAGTG                  | TCCAGCTTCC          | CCTGGGGTTT          | GGTACCAGGA           |
| 43400075 | CpG54    | CCACCTCTAC                 | CCAATAACAT                  | TTCCCCAGTG          | <b>T</b> CGCCACAAG  | CACCTCCTGC           |
| 43400125 | CpG55    | ACCCCATAAC                 | ATCCCCCAG                   | TGTCAAGGCA          | GG <b>CGT</b> CTACC | CCCACCTCAG           |
| 43400175 | CpG56-57 | TGCCTGACAC                 | T <b>CCGCG</b> GGGT         | TCAATACAAG          | AACTCCTGC           | ACCCAGTAAT           |
| 43400225 | CpG58-60 | CCTTTCCAGC                 | TGC <b>CGAC</b> ACA         | AGGACATTCT          | AAACCTAATA          | ACTCT <b>CGCG</b>    |
| 43400275 | CpG61-63 | AGTGT <b>CAGTA</b>         | CAAGGGT <b>CG</b>           | CCC <b>CGCT</b> CTC | AGTGCCCAGC          | TCCCC <b>CGGG</b>    |
| 43400325 | CpG64-66 | TATCAGCTGA                 | AACATCAGCT                  | <b>CGCCCC</b> Tgg   | <b>gCGctccCGg</b>   | <b>agtatcagca</b>    |
| 43400375 | CpG67-70 | <b>aaagggttCG</b>          | <b>cccCG</b> ccac           | <b>agtgccCGgc</b>   | <b>tccccCGgg</b>    | <b>tatcaaaaga</b>    |
| 43400425 | CpG71-74 | <b>aggatCGgct</b>          | <b>cCG</b> cccc <b>CGg</b>  | <b>gctcccCGgg</b>   | <b>ggagttgata</b>   | <b>gaagggctct</b>    |
| 43400475 | CpG75-77 | <b>tcccaccctt</b>          | <b>tgcCG</b> tcccc          | <b>actcctgtgc</b>   | <b>ctaCG</b> accca  | <b>ggagCG</b> tgtc   |
| 43400525 | CpG78-80 | <b>agccaaagca</b>          | <b>tggagaatca</b>           | <b>agagaaggCG</b>   | <b>agtatCGCGg</b>   | <b>gccacatggt</b>    |
| 43400575 | CpG81-86 | <b>CGaCG</b> tagt <b>C</b> | <b>G</b> tgat <b>CG</b> gag | <b>gtggcatttc</b>   | <b>agGTCAGTGT</b>   | <b>GGACCGTAGC</b>    |
| 43400625 |          | <b>GGTGGC</b> CTGG         | GGGACCCTGG                  | CCAGTGAGGG          | GTAGGGGAAC          | CTACAGTAGC           |
| 43400675 | CpG87    | TCTTGTGGTG                 | TTTGGGGGTC                  | TCTCATGCAT          | <b>GCG</b> AGAGTGT  | AGTGTAGCCA           |
| 43400725 | CpG88    | TGGCTTGGCC                 | CCATATCCTG                  | <b>CGAGGT</b> AGGA  | GTGGGGGTTG          | TGCCAGTTTT           |
| 43400775 |          | GCTGGTGGTG                 | TGACTGGGGG                  | AGGCAGACAC          | AATAATTTTA          | CTACTACTAC           |

**Figure 1.** The sequence and structure of the *MAOA* promoter region. The first CpG island begins at bp 43398975 and contains 18 CpG residues. A second CpG island begins at bp 43399493 and contains 70 CpG residues. The position of each of the CpG residues is noted in the figure. The first exon of *MAOA* is denoted by small blue letters and is wholly contained within the second island. The positions of the primers used to amplify the *MAOA* VNTR are denoted by boxed letters. The transcription start site (TSS) is at bp43400353 between CpG residues 64 and 65.
